# Supplementary material
Source: PubMed Central journal article supplement (PMC4425228)
Supplement: Supp_Data.pdf [file Supp_Data.pdf]

## Supplementary Data

### Supplementary Materials and Methods

#### Immunohistochemical analysis

Four percent of PFA-fixed paraffin-embedded testes were sliced into 7- $\mu$ m-thick sections. Immunohistochemical analysis was conducted as described previously [16] using the following antibodies: a rat anti-TRA98 (a gift from Y.

Nishimune, Osaka University), a rabbit anti-VASA antibody (Abcam), a goat anti-GFR $\alpha$ 1 antibody (Neuromics), and a rabbit anti-phospho-histone H3 antibody (Ser10; Cell Signaling). For the detection of GFR $\alpha$ 1, we used the Can Get Signal immunostain (Toyobo). The resulting signals were detected using incubation with Alexa 488- or Alexa 594-conjugated anti-IgG antibodies (Molecular Probes).

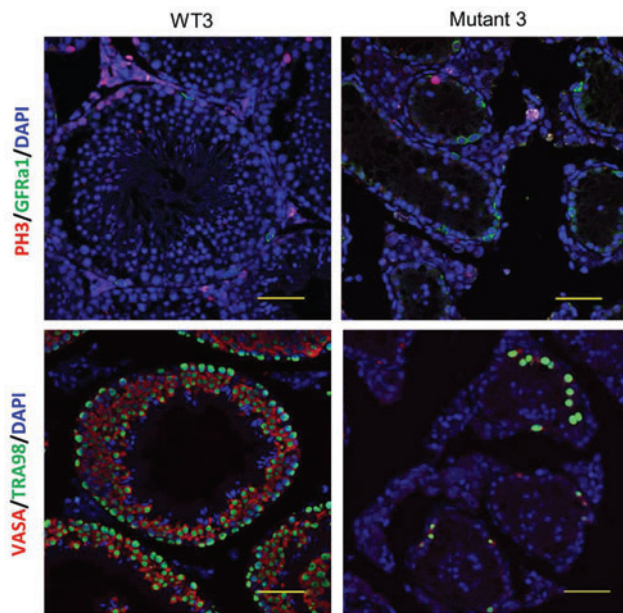

**SUPPLEMENTARY FIG. S1.** Immunohistochemistry of the *Eif2s3y* knockout mouse. Immunohistochemical analyses using staining for PH3 (red)/GFR $\alpha$ 1 (green)/DAPI (blue) and VASA (red)/TRA98 (green)/DAPI (blue). Mutant 3 showed an increased GFR $\alpha$ 1 signal, a lesser TRA98 signal, and a lesser VASA signal, suggesting that the differentiation of undifferentiated spermatogonia was arrested. GFR $\alpha$ 1 is a marker of undifferentiated spermatogonia, and TRA98/VASA are markers of testicular germ cells. The scale bar is 50  $\mu$ m.
